# Supplementary material for: Incidence of syphilis among HIV-infected men in Singapore, 2006–2017: temporal trends and associated risk factors
Source: PubMed Central journal article supplement — Sex Transm Infect. 2019 Aug 1;96(4):293–9. doi: 10.1136/sextrans-2019-054163 (PMC7279196; doi:10.1136/sextrans-2019-054163), 2019-08-01
Supplement: sextrans-2019-054163supp001.pdf [file sextrans-2019-054163supp001.pdf]

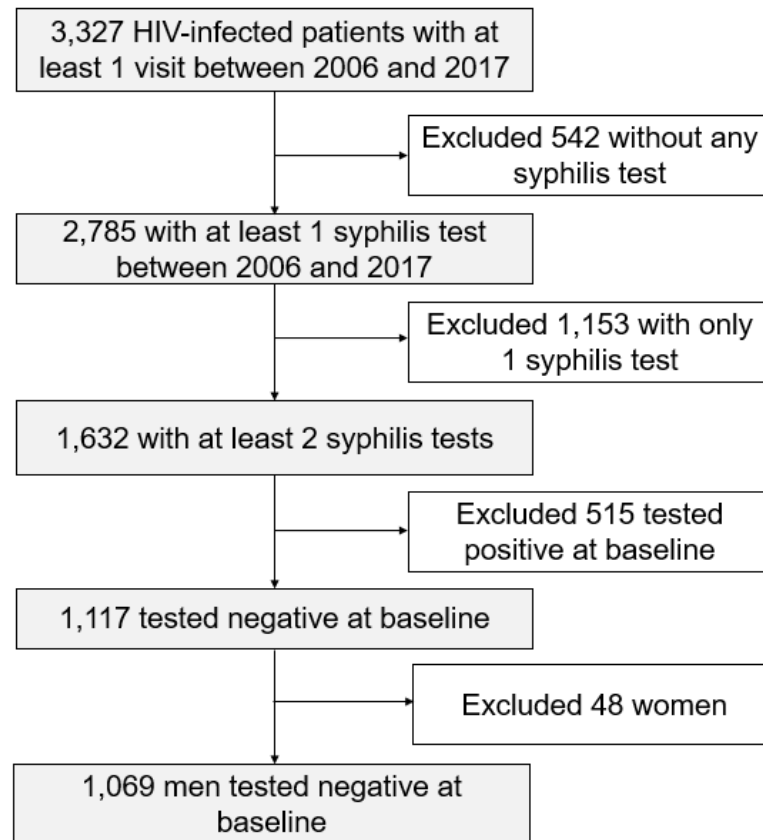

**Supplementary figure. Cohort selection flowchart for estimation of syphilis incidence among HIV-infected men who attended the national referral centre for HIV in Singapore, 2006–2017.**
