# Supplementary material for: Incidence of syphilis among HIV-infected men in Singapore, 2006–2017: temporal trends and associated risk factors
Source: PubMed Central journal article supplement — Sex Transm Infect. 2019 Aug 1;96(4):293–9. doi: 10.1136/sextrans-2019-054163 (PMC7279196; doi:10.1136/sextrans-2019-054163), 2019-08-01
Supplement: sextrans-2019-054163supp002.pdf [file sextrans-2019-054163supp002.pdf]

**Supplementary table. Estimates of syphilis incidence and associated risk factors among HIV-infected patients in Singapore and other countries**

| Country                                     | Study subjects                                                                                                                                                                | Incidence rate per 100 PYFU (95% CI)                                                                                                                | Independent risk factors                                                                                                                                                                                                                                                                 |
|---------------------------------------------|-------------------------------------------------------------------------------------------------------------------------------------------------------------------------------|-----------------------------------------------------------------------------------------------------------------------------------------------------|------------------------------------------------------------------------------------------------------------------------------------------------------------------------------------------------------------------------------------------------------------------------------------------|
| Singapore                                   | 1,117 HIV-infected persons who had at least one visit to the national referral centre for HIV care and diagnosed with HIV infection in 2006-2017, including 1,069 men         | Men and women: 5.94 (5.24–6.69)<br>Men: 6.21 (5.49–7.00)<br>MSM: 9.00 (7.86–10.27)<br>Heterosexual men: 2.22 (1.54–3.10)<br>Women: 0.00 (0.00–1.87) | Among men: <ul style="list-style-type: none"> <li>• Age 15-24 years compared with ≥45 years</li> <li>• Chinese ethnicity compared with Indian and other minority ethnic groups</li> <li>• HIV exposure via MSM contact</li> <li>• HIV diagnosis in the period after 2006-2008</li> </ul> |
| South Korea, Taiwan, Hong Kong <sup>1</sup> | 657 HIV-infected persons from three participating sites of the TREAT Asia HIV Observational Database (TAHOD) that routinely tested for syphilis, September 2004 to March 2014 | Men and women: 5.38 (4.52–6.41)<br>MSM: 7.64 (6.29–9.28)<br>Non-MSM: 2.44 (1.65–3.61)                                                               | Among men and women: <ul style="list-style-type: none"> <li>• HIV exposure via MSM contact</li> <li>• Past diagnosis of syphilis</li> <li>• Younger age</li> </ul>                                                                                                                       |
| South Korea <sup>2</sup>                    | 539 HIV-infected persons aged >15 years who started highly active antiretroviral therapy (HAART) at Seoul National University Hospital in South Korea, 1998-2006              | <u>Men and women</u><br>Early syphilis for 4 years after the start of ART: 4.57 (3.45–5.93)                                                         |                                                                                                                                                                                                                                                                                          |
| Japan <sup>3</sup>                          | 671 HIV-infected MSM who visited a large HIV clinic in Tokyo for the first time in 2008-2013                                                                                  | MSM: 4.37 (3.65–5.23)                                                                                                                               | Among MSM: <ul style="list-style-type: none"> <li>• Younger age</li> <li>• History of syphilis at baseline</li> <li>• Positive anti-amoeba antibody</li> <li>• High baseline CD4 count (≥350 vs. &lt;200)</li> </ul>                                                                     |

| Country                    | Study subjects                                                                                                                                         | Incidence rate per 100 PYFU (95% CI)                                                                            | Independent risk factors                                                                                                                                                                                                                         |
|----------------------------|--------------------------------------------------------------------------------------------------------------------------------------------------------|-----------------------------------------------------------------------------------------------------------------|--------------------------------------------------------------------------------------------------------------------------------------------------------------------------------------------------------------------------------------------------|
| China <sup>4</sup>         | 634 HIV-infected patients who attended an outpatient clinic of a designated AIDS treatment hospital in Shenyang city between March 2009 and May 2013   | Men and women: 18.7 (15.5–21.8)<br>Men: 19.3<br>Women: 7.4<br>MSM: 19.5<br>Heterosexuals: 17.0                  | Among men and women: <ul style="list-style-type: none"> <li>• HIV exposure via MSM contact</li> <li>• Received ART at baseline</li> <li>• Older age (≥40 years vs. ≤24 years)</li> </ul>                                                         |
| United States <sup>5</sup> | 6,888 HIV-infected adults who received care at an active HIV Outpatient Study (HOPS) site in the United States between 1 January 1999 and 30 June 2015 | Men and women: 1.8 (1.6–1.9)<br>All men: 2.2 (2.0–2.3)<br>MSM: 2.5 (2.3–2.7)<br>Heterosexual men: 1.0 (0.8–1.3) | Among men and women: <ul style="list-style-type: none"> <li>• HIV exposure via MSM contact</li> <li>• Age 18-30 years compared with 31-40 years</li> <li>• Non-Hispanic blacks</li> <li>• Observed in later calendar years after 1999</li> </ul> |
| United States <sup>6</sup> | 622 HIV-infected patients seen at 14 medical centres under an integrated health care system, Kaiser Permanente Northern California (KPNC), 1995-2005   | Men and women: 6.23                                                                                             | Among men and women: <ul style="list-style-type: none"> <li>• Not on ART (adjusted for gender, AIDS diagnosis, age, and HIV risk behaviour)</li> </ul>                                                                                           |
| Switzerland <sup>7</sup>   | 3,575 HIV-infected persons enrolled in the Swiss HIV Cohort Study (SHCS) in 2004-2014, including 1,519 MSM                                             | MSM: 2.68 (2.35–3.08)<br>Heterosexuals: 0.18 (0.11–0.30)<br>IDUs: 0.13 (0.05–0.35)                              | Among MSM: <ul style="list-style-type: none"> <li>• Younger age</li> <li>• History of condomless sex with an occasional partner</li> <li>• Higher frequency of syphilis testing</li> <li>• Observed in later calendar years</li> </ul>           |
| Canada <sup>8</sup>        | 2,271 HIV-infected MSM who received specialty HIV care at one of 10 hospital- or community-based practices                                             | <u>MSM</u><br>New syphilis diagnosis (first documented diagnosis or subsequent diagnosis): 3.3 (2.9–3.7)        | Among MSM (any new syphilis diagnosis): <ul style="list-style-type: none"> <li>• Younger age</li> <li>• Previous syphilis diagnosis</li> </ul>                                                                                                   |

| Country                       | Study subjects                                                                                                                                                                                                                                                                                                                                                                    | Incidence rate per 100 PYFU (95% CI)                                                                                                                                                                                                                                                                                                                                                                                   | Independent risk factors                                                                                              |
|-------------------------------|-----------------------------------------------------------------------------------------------------------------------------------------------------------------------------------------------------------------------------------------------------------------------------------------------------------------------------------------------------------------------------------|------------------------------------------------------------------------------------------------------------------------------------------------------------------------------------------------------------------------------------------------------------------------------------------------------------------------------------------------------------------------------------------------------------------------|-----------------------------------------------------------------------------------------------------------------------|
|                               | enrolled in the Ontario HIV Treatment Network Cohort Study (OCS) in 2006-2010.                                                                                                                                                                                                                                                                                                    | First syphilis diagnoses:<br>2.0 (1.7—2.4)<br><br>Re-diagnoses:<br>7.5 (6.3—8.8)                                                                                                                                                                                                                                                                                                                                       | <ul style="list-style-type: none"> <li>• Lower CD4 cell counts</li> <li>• Observed in later calendar years</li> </ul> |
| Canada <sup>9</sup>           | 2,448 HIV-infected patients on follow-up at the Calgary STI Program and the Southern Alberta Clinic with at least one regular visit in 2006-2016                                                                                                                                                                                                                                  | Men and women: 1.29 (0.96—1.61)                                                                                                                                                                                                                                                                                                                                                                                        |                                                                                                                       |
| The Netherlands <sup>10</sup> | HIV-infected patients who attended a HIV-outpatient clinic at a university hospital in Amsterdam from March to June 2003, and September through December 2003.<br><br>Study subjects comprised 1,105 including 630 MSM for retrospective analysis from January 2000 through June 2003, and 1,010 including 571 MSM for prospective analysis from September through December 2003. | Retrospective analysis<br><u>Men and women</u><br>Total incidence: 2.7<br>Incidence of asymptomatic infection: 0.9<br><br><u>MSM</u><br>Total incidence: 4.6<br>Incidence of asymptomatic infection: 1.5<br><br>Prospective analysis<br><u>Men and women</u><br>Total incidence: 3.5<br>Incidence of asymptomatic infection: 0.8<br><br><u>MSM</u><br>Total incidence: 6.2<br>Incidence of asymptomatic infection: 1.4 |                                                                                                                       |

PYFU: Person-years of follow-up

## References

1. Ahn JY, Boettiger D, Kiertiburanakul S, *et al*; Treat Asia HIV Observational Database. Incidence of syphilis seroconversion among HIV-infected persons in Asia: results from the TREAT Asia HIV Observational Database. *J Int AIDS Soc* 2016;19:20965.
2. Park WB, Jang HC, Kim SH, *et al*. Effect of highly active antiretroviral therapy on incidence of early syphilis in HIV-infected patients. *Sex Transm Dis* 2008;35:304-6.
3. Nishijima T, Teruya K, Shibata S, *et al*. Incidence and risk factors for incident syphilis among HIV-1-Infected men who have sex with men in a large urban HIV clinic in Tokyo, 2008-2015. *PLoS One* 2016;11:e0168642.
4. Hu QH, Xu JJ, Zou HC, *et al*. Risk factors associated with prevalent and incident syphilis among an HIV-infected cohort in Northeast China. *BMC Infect Dis* 2014;14:658.
5. Novak RM, Ghanem A, Hart R, *et al*; HIV Outpatient Study Investigators. Risk Factors and Incidence of Syphilis in Human Immunodeficiency Virus (HIV)-Infected Persons: The HIV Outpatient Study, 1999-2015. *Clin Infect Dis* 2018;67:1750-9.
6. Horberg MA, Ranatunga DK, Quesenberry CP, *et al*. Syphilis epidemiology and clinical outcomes in HIV-infected and HIV-uninfected patients in Kaiser Permanente Northern California. *Sex Transm Dis* 2010;37:53-8. .
7. Shilaih M, Marzel A, Braun DL, *et al*; the Swiss HIV Cohort Study. Factors associated with syphilis incidence in the HIV-infected in the era of highly active antiretrovirals. *Medicine (Baltimore)* 2017;96:e5849.
8. Burchell AN, Allen VG, Gardner SL, *et al*; OHTN Cohort Study Team. High incidence of diagnosis with syphilis co-infection among men who have sex with men in an HIV cohort in Ontario, Canada. *BMC Infect Dis* 2015;15:356..
9. Lang R, Read R, Krentz HB, *et al*. Increasing incidence of syphilis among patients engaged in HIV care in Alberta, Canada: a retrospective clinic-based cohort study. *BMC Infect Dis* 2018;18:125.
10. Branger J, van der Meer JT, van Ketel RJ, *et al*. High incidence of asymptomatic syphilis in HIV-infected MSM justifies routine screening. *Sex Transm Dis*. 2009;36(2):84-85.
